# Supplementary material for: Composition and Distribution of Plankton Communities in the Atlantic Sector of the Southern Ocean
Source: MDPI journal article supplement (doi:10.3390/d14110923), 2022-10-28
Supplement: s1 [file s1]

**Table S1.** List of stations conducted onboard the 87<sup>th</sup> cruise of the R/V *Akademik Mstislav Keldysh* during January-February 2022 in the Atlantic sectors of the Southern Ocean

| Station No. | Date       | Time  | Location                 | Depth Sampled (m) | Study area        | Gears                                  |
|-------------|------------|-------|--------------------------|-------------------|-------------------|----------------------------------------|
| 7294        | 21.01.2022 | 10-10 | 62° 52.0 S<br>57° 09.4 W | 150               | Bransfield Strait | CTD, Apshtein net, Bongo net, WP-2 net |
| 7295        | 21.01.2022 | 12-40 | 62° 49.5 S<br>57° 15.9 W | 173               | Bransfield Strait | CTD, Apshtein net                      |
| 7297        | 21.01.2022 | 16-00 | 62° 40.0 S<br>57° 39.6 W | 720               | Bransfield Strait | Apshtein net, Bongo net                |
| 7299        | 21.01.2022 | 22-15 | 62° 30.9 S<br>58° 08.0 W | 1880              | Bransfield Strait | CTD, Multinet, DSN                     |
| 7301        | 22.01.2022 | 19-48 | 62° 26.3 S<br>58° 21.2 W | 970               | Bransfield Strait | CTD, Apshtein net                      |
| 7303        | 23.01.2022 | 04-37 | 63° 00.1 S<br>58° 04.2 W | 223               | Bransfield Strait | CTD, DSN                               |
| 7305        | 23.01.2022 | 14-40 | 62° 21.0 S<br>58° 37.0 W | 670               | Bransfield Strait | CTD, Multinet, Apshtein net, DSN       |
| 7308        | 24.01.2022 | 08-00 | 63° 10.0 S<br>58° 20.0 W | 196               | Bransfield Strait | CTD, Apshtein net, Bongo net, WP-2 net |
| 7309        | 24.01.2022 | 10-53 | 63° 02.2 S<br>58° 36.6 W | 194               | Bransfield Strait | CTD, Apshtein net                      |
| 7310        | 24.01.2022 | 12-54 | 62° 53.0 S<br>58° 53.1 W | 766               | Bransfield Strait | CTD, Multinet, Apshtein net, DSN       |
| 7311        | 24.01.2022 | 18-00 | 62° 36.9 S<br>59° 27.3 W | 1258              | Bransfield Strait | CTD, Apshtein net                      |
| 7313        | 25.01.2022 | 15-25 | 62° 33.5 S<br>59° 33.9 W | 400               | Bransfield Strait | CTD, Apshtein net                      |
| 7314        | 25.01.2022 | 19-45 | 62° 35.0 S<br>59° 31.9 W | 603               | Bransfield Strait | CTD, Multinet, Apshtein net, DSN       |

|      |            |       |                          |      |                   |                                  |
|------|------------|-------|--------------------------|------|-------------------|----------------------------------|
| 7316 | 26.01.2022 | 00-42 | 62° 40.0 S<br>59° 22.1 W |      | Bransfield Strait | CTD, Multinet, Apshtein net, DSN |
| 7318 | 26.01.2022 | 14-00 | 63° 26.4 S<br>60° 05.7 W | 108  | Bransfield Strait | CTD, WP-2 net, Apshtein net, DSN |
| 7319 | 26.01.2022 | 15-55 | 63° 20.0 S<br>60° 13.9 W |      | Bransfield Strait | CTD, Apshtein net                |
| 7320 | 26.01.2022 | 17-44 | 63° 14.4 S<br>60° 19.3 W | 536  | Bransfield Strait | CTD, Multinet, Apshtein net, DSN |
| 7323 | 26.01.2022 | 23-35 | 63° 03.4 S<br>60° 32.9 W | 357  | Bransfield Strait | Apshtein net, DSN, WP-2 net      |
| 7324 | 27.01.2022 | 15-55 | 63° 11.1 S<br>57° 01.9 W | 108  | Antarctic Sound   | CTD, Apshtein net                |
| 7325 | 27.01.2022 | 17-44 | 63° 16.8 S<br>56° 51.5 W | 197  | Antarctic Sound   | Apshtein net, DSN, WP-2 net      |
| 7329 | 27.01.2022 | 23-36 | 63° 22.6 S<br>56° 43.8 W | 310  | Antarctic Sound   | CTD, Apshtein net                |
| 7332 | 28.01.2022 | 10-06 | 63° 28.6 S<br>56° 31.2 W | 1008 | Antarctic Sound   | CTD, Multinet, Apshtein net, DSN |
| 7333 | 28.01.2022 | 13-26 | 63° 34.9 S<br>56° 22.8 W | 720  | Antarctic Sound   | CTD, Apshtein net                |
| 7334 | 28.01.2022 | 16-15 | 63° 45.0 S<br>55° 53.1 W | 338  | Weddell Sea       | CTD, Apshtein net                |
| 7335 | 28.01.2022 | 20-09 | 64° 09.6 S<br>56° 01.5 W | 380  | Weddell Sea       | CTD, Apshtein net                |
| 7336 | 29.01.2022 | 00-00 | 64° 28.8 S<br>56° 04.7 W | 300  | Weddell Sea       | CTD, Multinet, Apshtein net, DSN |
| 7339 | 29.01.2022 | 12-54 | 63° 34.1 S<br>54° 34.9 W | 220  | Weddell Sea       | CTD, Apshtein net                |
| 7340 | 29.01.2022 | 15-27 | 63° 27.0 S<br>54° 12.0 W | 237  | Weddell Sea       | CTD, Apshtein net                |
| 7341 | 29.01.2022 | 17-40 | 63° 19.7 S<br>53° 49.2 W | 280  | Weddell Sea       | CTD, Apshtein net                |

|      |            |       |                          |      |                              |                                  |
|------|------------|-------|--------------------------|------|------------------------------|----------------------------------|
| 7343 | 29.01.2022 | 22-24 | 63° 05.5 S<br>53° 01.3 W | 430  | Weddell Sea                  | CTD, Multinet, Apshtein net, DSN |
| 7348 | 30.01.2022 | 13-48 | 62° 50.1 S<br>52° 12.5 W | 2900 | Weddell Sea                  | CTD, Multinet, Apshtein net, DSN |
| 7359 | 02.02.2022 | 17-54 | 62° 34.8 S<br>51° 23.9 W | 3257 | Weddell Sea                  | CTD, Multinet, Apshtein net      |
| 7364 | 06.02.2022 | 08-29 | 61° 44.9 S<br>49° 00.0 W |      | Weddell Sea                  | CTD, Multinet, Apshtein net, DSN |
| 7366 | 06.02.2022 | 23-02 | 61° 13.8 S<br>47° 25.7 W | 2600 | Weddell Sea                  | CTD, Multinet, Apshtein net, DSN |
| 7367 | 07.02.2022 | 04-44 | 61° 14.8 S<br>47° 26.8 W | 2934 | Weddell Sea                  | CTD, Apshtein net                |
| 7369 | 07.02.2022 | 15-55 | 61° 10.7 S<br>46° 57.6 W | 1000 | Weddell Sea                  | CTD, Apshtein net                |
| 7370 | 07.02.2022 | 17-56 | 61° 07.4 S<br>46° 48.4 W | 900  | Weddell Sea                  | CTD, Multinet, Apshtein net, DSN |
| 7372 | 08.02.2022 | 08-35 | 61° 01.9 S<br>44° 53.6 W | 250  | off the South Orkney Islands | CTD, Apshtein net                |
| 7373 | 08.02.2022 | 14-59 | 60° 56.5 S<br>43° 18.1 W | 365  | off the South Orkney Islands | CTD, Multinet, Apshtein net, DSN |
| 7377 | 09.02.2022 | 20-45 | 60° 36.9 S<br>42° 08.3 W | 3580 | off the South Orkney Islands | CTD, Multinet, DSN               |
| 7382 | 10.02.2022 | 18-02 | 60° 34.4 S<br>42° 07.4 W | 3965 | off the South Orkney Islands | CTD, Multinet, DSN               |

---
